# Supplementary material for: Synthesis of a multi-branched dandelion-like SAPO-11 by an in situ inoculating seed-induced-steam-assisted conversion method (SISAC) as a highly effective hydroisomerization support
Source: Royal Society of Chemistry journal article supplement (doi:10.1039/c6ra26522g), 2017-01-01
Supplement: c6ra26522g1.pdf [file c6ra26522g1.pdf]

## Supporting Information

### **Synthesis of a multi-branched dandelion-like SAPO-11 by an in-situ inoculating seed-induced-steam-assisted conversion method (SISAC) as a highly effective hydroisomerization support**

Zhou Chen,<sup>a</sup> Wenjing Song,<sup>a</sup> Shaohong Zhu,<sup>a</sup> Weikun Lai,<sup>a</sup> Xiaodong Yi<sup>a\*</sup> and Weiping Fang<sup>a</sup>

<sup>a,\*</sup> National Engineering Laboratory for Green Chemical Productions of Alcohols, Ethers and Esters, College of Chemistry and Chemical Engineering, Xiamen University, Xiamen 361005, P. R. China.

\*Corresponding author: xdyi@xmu.edu.cn.

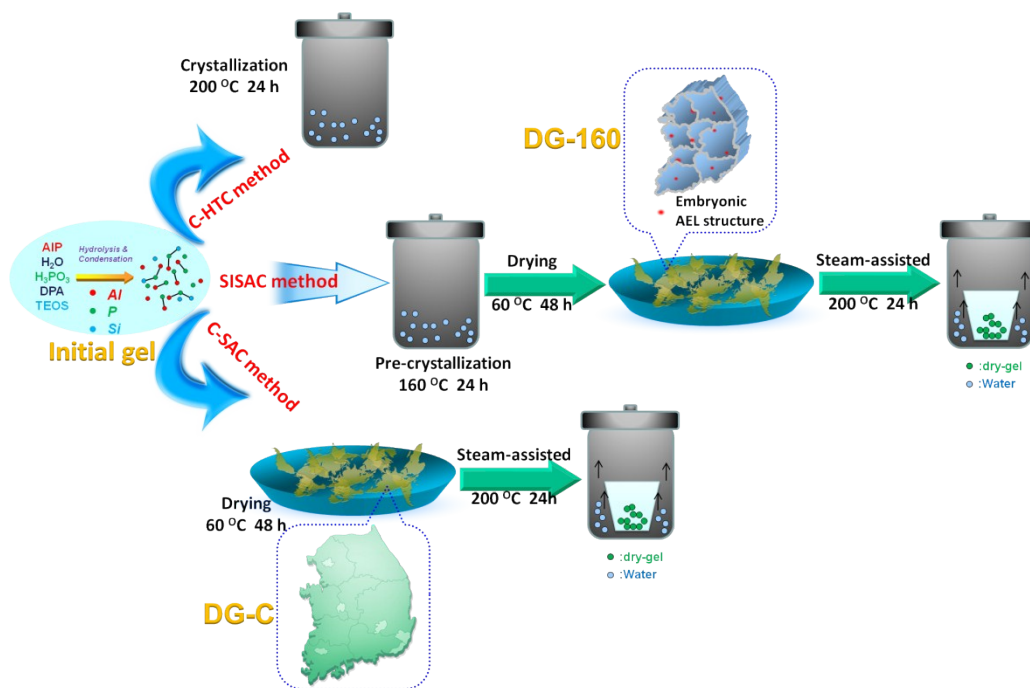

Scheme S1. The synthesis route of SAPO-11 zeolite by three methods.

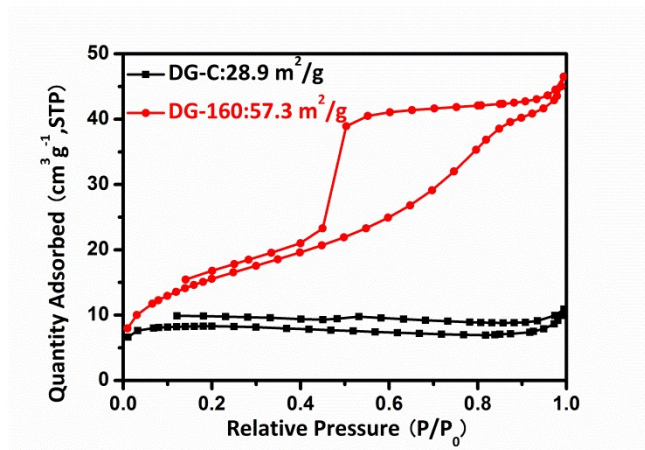

Figure S1  $\text{N}_2$  adsorption-desorption isotherms of synthesized (black) DG-C, (red) DG-160

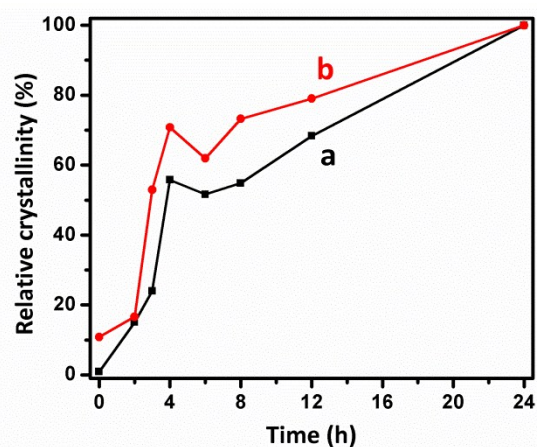

**Figure S2** Crystallization curves obtained under SAC process during different period at 473 K using different method: (a) dry gel without pre-crystallization, (b) dry gel with pre-crystallization at 433 K for 24 h. And the calculative relative crystallinity value was versus to the corresponding 24 h SAC product, respectively.

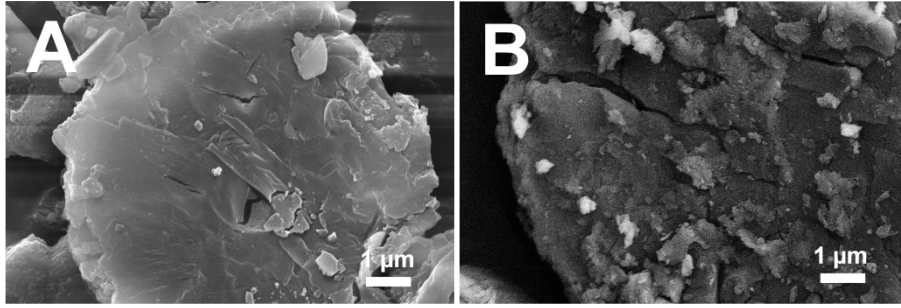

**Figure S3** SEM image of DG-C (A) and DG-160 (B).

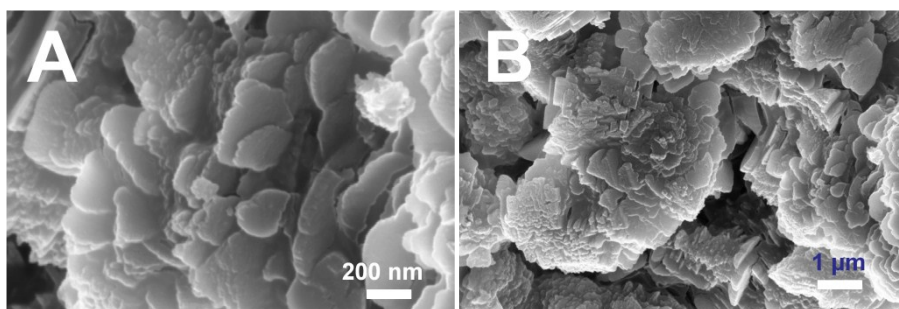

**Figure S4** SEM image of seed-SAC-SAPO-11

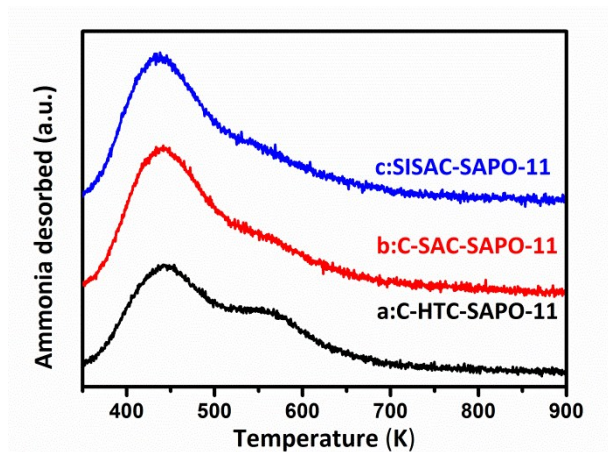

**Figure S5.** NH<sub>3</sub>-TPD profiles of (a) C-HTC-SAPO-11, (b) C-SAC-SAPO-11 and (c) SISAC-SAPO-11
